# Supplementary material for: The Association Between Quantitative Flow Ratio and Intravascular Imaging-defined Vulnerable Plaque Characteristics in Patients With Stable Angina and Non-ST-segment Elevation Acute Coronary Syndrome
Source: PubMed Central journal article supplement (PMC8278311; doi:10.3389/fcvm.2021.690262), 2021-06-30
Supplement: Data_Sheet_1.pdf [file Data_Sheet_1.pdf]

## *Supplementary Material*

**Supplementary Table 1.** Baseline characteristics of VH-IVUS cohort

|                                                        | VH-IVUS cohort   |
|--------------------------------------------------------|------------------|
| <b><i>Clinical and demographic characteristics</i></b> |                  |
| Patient No.                                            | 40               |
| Age, years                                             | 63.8 ± 10.1      |
| Male                                                   | 23 (57.5)        |
| Body mass index, kg/m <sup>2</sup>                     | 24.8 ± 4.8       |
| Hypertension                                           | 29 (72.5)        |
| Diabetes mellitus                                      | 10 (25.0)        |
| Dyslipidemia                                           | 11 (27.5)        |
| Smoking                                                | 7 (17.5)         |
| Previous MI                                            | 1 (2.5)          |
| Previous PCI                                           | 3 (7.5)          |
| LVEF, %                                                | 68.3 (65.3–74.8) |
| Triglyceride, mmol/L                                   | 1.3 (1.0–2.1)    |
| Total cholesterol, mmol/L                              | 4.3 (3.4–4.9)    |
| LDL cholesterol, mmol/L                                | 2.4 (1.9–3.1)    |
| HDL cholesterol, mmol/L                                | 1.2 (1.0–1.4)    |
| <b>Symptoms</b>                                        |                  |
| Stable angina                                          | 19 (47.5)        |
| Unstable angina                                        | 20 (50.0)        |
| NSTEMI                                                 | 1 (2.5)          |
| <b>Medications</b>                                     |                  |
| Aspirin                                                | 9 (22.5)         |
| Statins                                                | 8 (20.0)         |
| β-blockers                                             | 4 (10.0)         |
| ACEI/ARB                                               | 14 (35.0)        |
| Calcium channel blockers                               | 13 (32.5)        |
| <b><i>Interrogated vessel characteristics</i></b>      |                  |
| Lesion No.                                             | 40               |
| <b>Lesion location</b>                                 |                  |
| LAD                                                    | 32 (80.0)        |
| LCX                                                    | 3 (7.5)          |
| RCA                                                    | 5 (12.5)         |
| <b>3D-QCA</b>                                          |                  |
| Diameter stenosis, %                                   | 45.3 (36.8–48.5) |
| Lesion length, mm                                      | 19.8 (11.9–25.8) |
| MLD, mm                                                | 1.6 (1.5–1.9)    |
| QFR                                                    | 0.88 (0.83–0.93) |

Values are expressed as n (%) or mean ± standard deviation or median (interquartile range).

ACEI, angiotensin converting enzyme inhibitor; ARB, angiotensin receptor inhibitor; HDL, high-density lipoprotein; LAD, left anterior descending artery; LCX, left circumflex artery; LDL, low-density lipoprotein; LVEF, left ventricular ejection fraction; MI, myocardial infarction; MLD, minimal lumen diameter; NSTEMI, non-ST-segment elevation myocardial infarction; PCI, percutaneous coronary intervention; QCA, quantitative coronary angiography; QFR, quantitative flow ratio; RCA, right coronary artery; VH-IVUS, virtual histology intravascular ultrasound.

**Supplementary Table 2.** Lesion characteristics according to the presence or absence of OCT-TCFA

|                         | OCT-TCFA         |                  | p-value |
|-------------------------|------------------|------------------|---------|
|                         | Yes (n = 23)     | No (n = 60)      |         |
| Lesion location         |                  |                  | 0.210   |
| LAD                     | 16 (69.6)        | 46 (76.7)        |         |
| LCX                     | 5 (21.7)         | 5 (8.3)          |         |
| RCA                     | 2 (8.7)          | 9 (15.0)         |         |
| 3D-QCA                  |                  |                  |         |
| Diameter stenosis, %    | 49.1 (39.2–73.8) | 38.1 (33.0–44.1) | 0.001   |
| Lesion length, mm       | 19.6 (12.3–28.6) | 15.6 (11.0–20.8) | 0.037   |
| MLD, mm                 | 1.3 (0.8–1.9)    | 1.6 (1.4–1.9)    | 0.038   |
| QFR                     | 0.83 (0.73–0.88) | 0.92 (0.86–0.96) | 0.002   |
| OCT findings            |                  |                  |         |
| MLA, mm <sup>2</sup>    | 2.35 (1.64–3.13) | 2.89 (2.07–3.81) | 0.092   |
| Area stenosis, %        | 65.9 ± 13.3      | 59.1 ± 12.6      | 0.035   |
| Lipid-rich plaque       | 23 (100.0)       | 51 (85.0)        | 0.057   |
| Maximum lipid arc, °    | 330 (220–360)    | 220 (180–310)    | 0.023   |
| Lipid length, mm        | 20.0 (14.0–22.0) | 12.0 (8.0–21.0)  | 0.037   |
| Lipid index, ° × mm     | 2720 (1970–3895) | 1901 (880–3032)  | 0.045   |
| Thinnest FCT, μm        | 50 (30–60)       | 150 (100–190)    | <0.001  |
| Plaque rupture          | 5 (21.7)         | 0 (0.0)          | 0.001   |
| Plaque erosion          | 8 (34.8)         | 2 (3.3)          | <0.001  |
| Thrombus                | 12 (52.2)        | 3 (5.0)          | <0.001  |
| Calcification           | 13 (56.5)        | 24 (40.0)        | 0.175   |
| Calcified nodule        | 0 (0.0)          | 5 (8.3)          | 0.316   |
| Microchannel            | 10 (43.5)        | 19 (31.7)        | 0.312   |
| Macrophage accumulation | 12 (52.2)        | 22 (36.7)        | 0.199   |
| Cholesterol crystal     | 10 (43.5)        | 19 (31.7)        | 0.312   |

Values are expressed as n (%) or mean ± standard deviation or median (interquartile range).

FCT, fibrous cap thickness; MLA, minimal lumen area; OCT, optical coherence tomography; TCFA, thin-capped fibroatheroma; other abbreviations as Supplementary Table 1.

**Supplementary Table 3.** Lesion characteristics according to the presence or absence of VH-TCFA

|                                    | VH-TCFA          |                  | p-value |
|------------------------------------|------------------|------------------|---------|
|                                    | Yes (n = 6)      | No (n = 34)      |         |
| Lesion location                    |                  |                  | 1.000   |
| LAD                                | 5 (83.3)         | 27 (79.4)        |         |
| LCX                                | 0 (0.0)          | 3 (8.8)          |         |
| RCA                                | 1 (16.7)         | 4 (11.8)         |         |
| 3D-QCA                             |                  |                  |         |
| Diameter stenosis, %               | 46.5 (35.5–48.8) | 43.7 (36.8–48.6) | 0.733   |
| Lesion length, mm                  | 13.6 (11.4–24.9) | 20.2 (12.0–26.1) | 0.495   |
| MLD, mm                            | 1.6 (1.5–1.9)    | 1.7 (1.5–1.9)    | 0.804   |
| QFR                                | 0.89 (0.84–0.94) | 0.88 (0.82–0.94) | 0.732   |
| Grayscale IVUS findings            |                  |                  |         |
| EEM CSA, mm <sup>2</sup>           | 13.1 (11.1–16.4) | 12.3 (10.5–15.4) | 0.596   |
| Plaque + media, mm <sup>2</sup>    | 9.1 (7.5–9.4)    | 8.6 (7.0–11.1)   | 0.820   |
| Plaque burden, %                   | 67.7 (58.4–71.5) | 69.9 (64.5–77.1) | 0.248   |
| MLA, mm <sup>2</sup>               | 4.1 (3.3–6.9)    | 3.8 (3.2–4.5)    | 0.343   |
| Reference EEM CSA, mm <sup>2</sup> | 13.7 (11.0–16.6) | 13.3 (11.6–15.5) | 0.895   |
| Remodeling index                   | 1.01 (0.90–1.07) | 0.89 (0.80–1.08) | 0.353   |
| Positive remodeling                | 2 (33.3)         | 11 (32.4)        | 1.000   |
| Negative remodeling                | 2 (33.3)         | 20 (58.8)        | 0.381   |
| VH-IVUS findings                   |                  |                  |         |
| Fibrous tissue, mm <sup>2</sup>    | 2.7 (2.1–3.6)    | 2.7 (1.9–4.9)    | 0.940   |
| Fibrous tissue, %                  | 57.1 (48.8–63.0) | 60.2 (45.8–66.8) | 0.622   |
| Fibrofatty tissue, mm <sup>2</sup> | 1.0 (0.3–2.0)    | 1.4 (0.6–2.1)    | 0.353   |
| Fibrofatty tissue, %               | 15.2 (9.0–31.5)  | 22.5 (15.0–32.5) | 0.256   |
| Necrotic core, mm <sup>2</sup>     | 1.0 (0.6–1.3)    | 0.5 (0.2–1.1)    | 0.217   |
| Necrotic core, %                   | 21.0 (11.2–25.2) | 9.7 (5.1–19.1)   | 0.140   |
| Dense calcium, mm <sup>2</sup>     | 0.2 (0.0–0.4)    | 0.1 (0.0–0.4)    | 0.664   |
| Dense calcium, %                   | 4.2 (0.5–7.9)    | 1.9 (0.0–6.1)    | 0.358   |

Values are expressed as n (%) or median (interquartile range).

CSA, cross-sectional area; EEM, external elastic membrane; other abbreviations as Supplementary Tables 1 and 2.

**Supplementary Table 4.** Diagnostic performance of QFR for the evaluation of plaque morphology

|                              | Cutoff | Sensitivity, %      | Specificity, %      | +LR              | -LR               | PPV, %              | NPV, %              | Accuracy, %         |
|------------------------------|--------|---------------------|---------------------|------------------|-------------------|---------------------|---------------------|---------------------|
| OCT-TCFA                     | ≤0.86  | 65.2<br>(42.7–83.6) | 73.3<br>(60.3–83.9) | 2.5<br>(1.5–4.1) | 0.5<br>(0.3–0.8)  | 48.4<br>(35.9–61.1) | 84.6<br>(75.5–90.8) | 71.1<br>(60.1–80.5) |
| OCT-MLA <3.5 mm <sup>2</sup> | ≤0.94  | 82.5<br>(70.9–91.0) | 65.0<br>(40.8–84.6) | 2.4<br>(1.3–4.3) | 0.3<br>(0.1–0.5)  | 88.1<br>(80.2–93.2) | 54.2<br>(38.7–68.9) | 78.3<br>(67.9–86.6) |
| Plaque burden ≥70%           | ≤0.92  | 96.0<br>(80.0–99.9) | 45.8<br>(25.6–67.2) | 1.8<br>(1.2–2.6) | 0.1<br>(0.01–0.6) | 64.9<br>(55.9–72.9) | 91.7<br>(60.6–98.8) | 71.4<br>(56.7–83.4) |
| IVUS-MLA <4 mm <sup>2</sup>  | ≤0.86  | 58.6<br>(38.9–76.5) | 80.0<br>(56.3–94.3) | 2.9<br>(1.2–7.4) | 0.5<br>(0.3–0.8)  | 81.0<br>(62.7–91.5) | 57.1<br>(45.1–68.4) | 67.4<br>(52.5–80.1) |

Values are expressed as absolute numbers (95% CI).

CI, confidence interval; +LR, positive likelihood ratio; -LR, negative likelihood ratio; NPV, negative predictive value; PPV, positive predictive value; other abbreviations as Supplementary Tables 1 and 2.

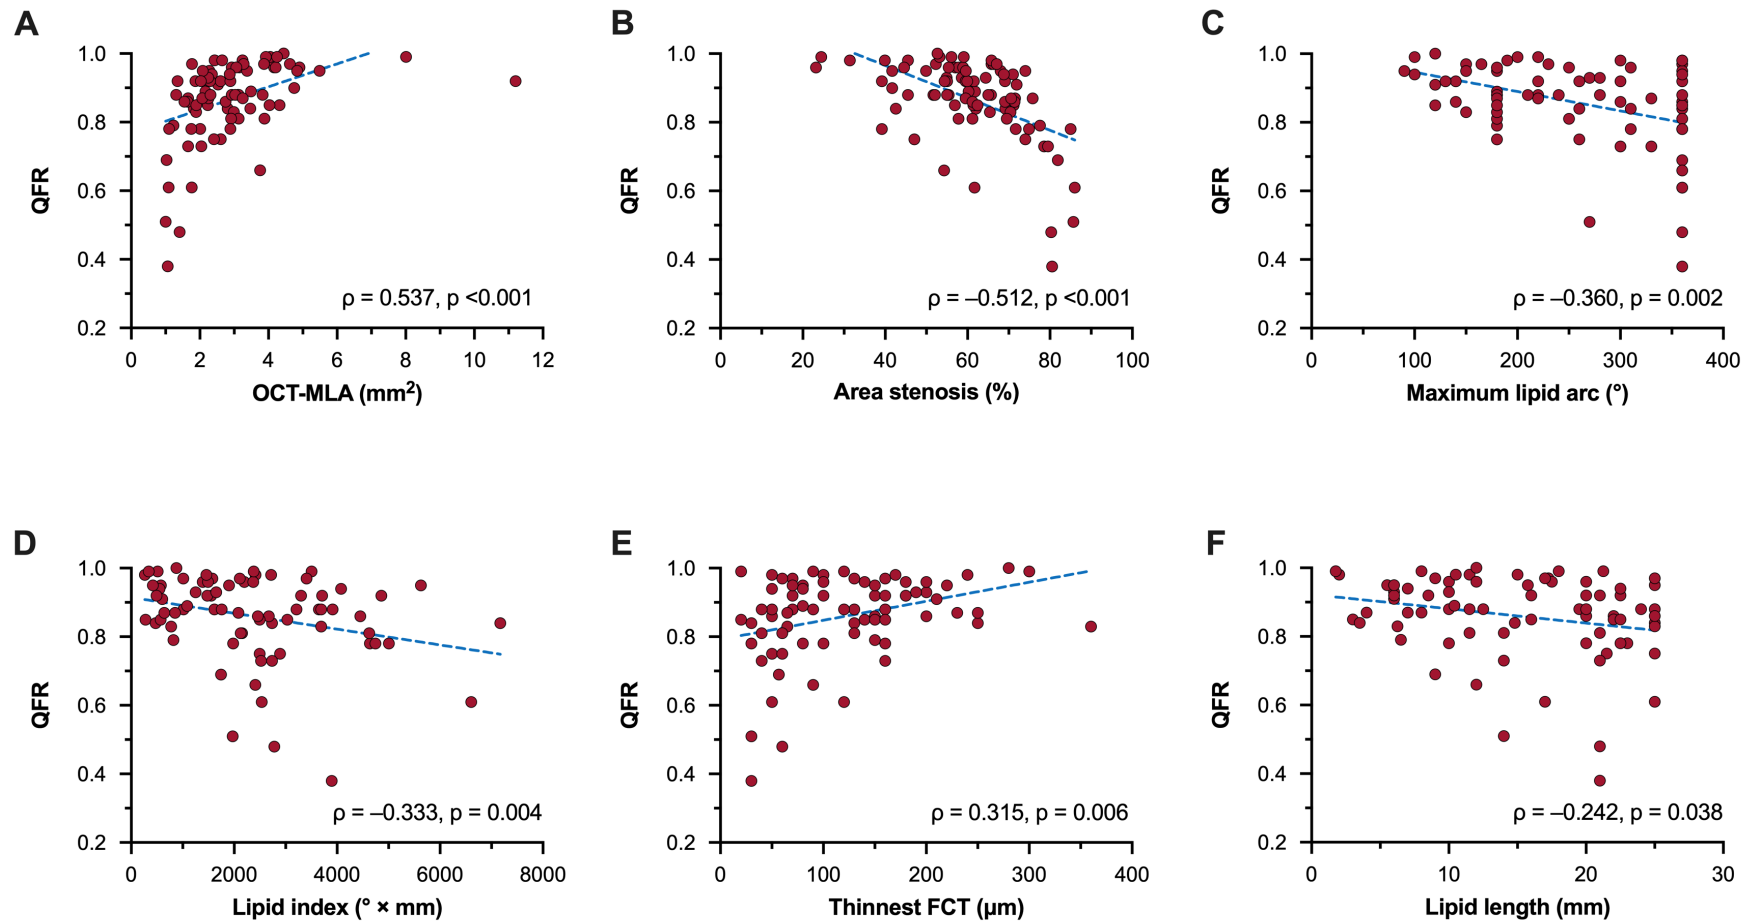

**Supplementary Figure 1.** Relationship between QFR and OCT-derived parameters. The Spearman's correlation analysis indicated that QFR was strongly related to OCT-MLA (A) and % area stenosis (B); QFR was modestly related to maximum lipid arc (C), lipid index (D), and thinnest FCT (E); QFR was weakly related to lipid length (F). Abbreviations as Supplementary Tables 1 and 2.

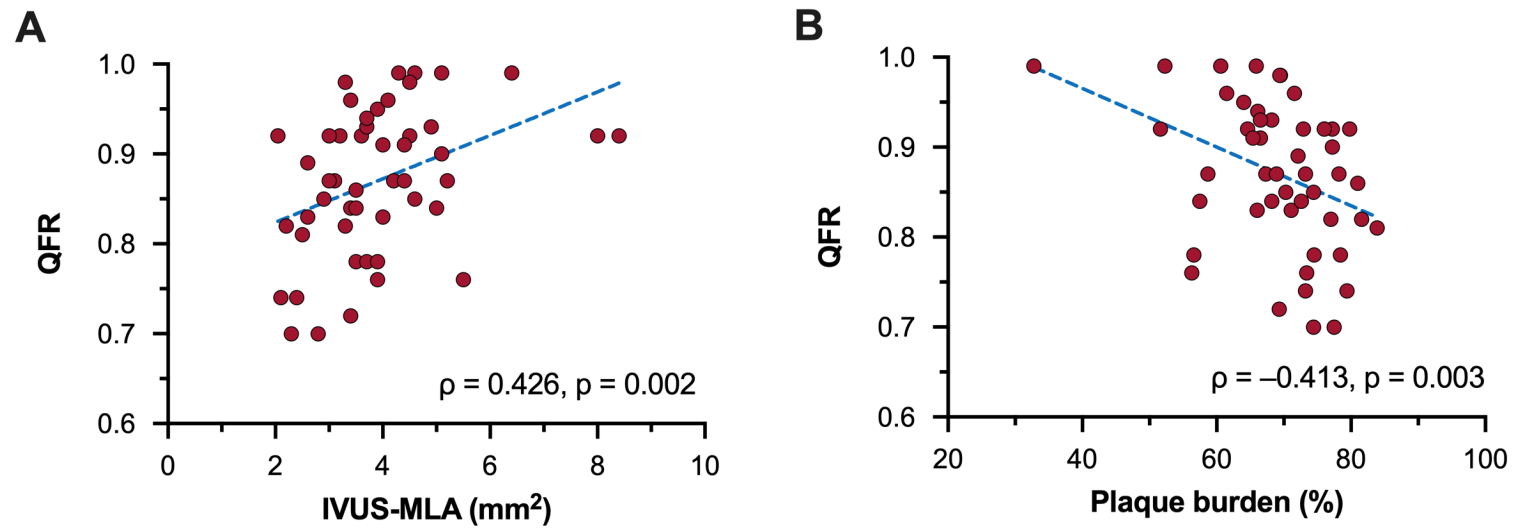

**Supplementary Figure 2.** Relationship between QFR and IVUS-derived parameters. QFR was modestly related to IVUS-MLA (A) and plaque burden (B). Abbreviations as Supplementary Tables 1 and 2.
